# Supplementary material
Source: PubMed Central journal article supplement (PMC3335370)
Supplement: supp_afs003_afs003supp.pdf [file supp_afs003_afs003supp.pdf]

## Supplementary data

**Table 1.**

The ICD10 codes, obtained from the database of Landspítalinn University Hospital, the main hospital in the capital city Reykjavik, were divided into nine mutually exclusive hospital groups.

---

| <b>Diseases</b>                                             | <b>ICD10</b>                                                                                                               |
|-------------------------------------------------------------|----------------------------------------------------------------------------------------------------------------------------|
| Coronary heart disease                                      | I21-I25                                                                                                                    |
| Atrial fibrillation                                         | I48                                                                                                                        |
| Pneumonia                                                   | J13-J18                                                                                                                    |
| Cancer                                                      | C00-C97                                                                                                                    |
| Fracture at osteoporotic sites                              | S12.1, S12.2, S22.0, S22.1, S32.0, T08, S32.1, S32.3, S32.4, S32.5, S42.2, S42.4, S52.5, S52.6, S72.0, S72.1, S72.2, S82.1 |
| Diseases in the digestive system                            | K00-K93                                                                                                                    |
| Disease of the musculoskeletal system and connective tissue | M00-M99                                                                                                                    |
| Disease of the genitourinary system                         | N00-N99                                                                                                                    |

---

Table 2. Hazard ratios for hospitalization by fracture group, sex and time since fracture

| Time since fracture         | N   | Adjusted for age and sex |            |     |         |         | Adjusted for age, sex, 6 meter walk, strength and co-morbidity |         |         |  |
|-----------------------------|-----|--------------------------|------------|-----|---------|---------|----------------------------------------------------------------|---------|---------|--|
|                             |     | N events                 | Percentage | HR  | CI 95%  | P-value | HR                                                             | CI 95%  | P-value |  |
| <b>Both sex</b>             |     |                          |            |     |         |         |                                                                |         |         |  |
| oOSfr ≤ 10 yrs <sup>a</sup> | 544 | 384                      | 70.6       | 1.3 | 1.2-1.4 | <.0001  | 1.2                                                            | 1.1-1.4 | 0.001   |  |
| oOSfr > 10 yrs <sup>b</sup> | 465 | 308                      | 66.2       | 1.1 | 1.0-1.3 | -       | 1.2                                                            | 1.0-1.3 | 0.02    |  |
| Ofr ≤ 10 yrs <sup>c</sup>   | 398 | 269                      | 67.6       | 1.2 | 1.1-1.4 | 0.003   | 1.2                                                            | 1.0-1.3 | 0.02    |  |
| Ofr > 10 yrs <sup>d</sup>   | 505 | 330                      | 65.3       | 1.0 | 0.9-1.2 | -       | 1.0                                                            | 0.9-1.2 | -       |  |
| Vfr ≤ 10 yrs <sup>e</sup>   | 191 | 149                      | 78.0       | 1.5 | 1.3-1.8 | <.0001  | 1.4                                                            | 1.2-1.6 | 0.0002  |  |
| Vfr > 10 yrs <sup>f</sup>   | 104 | 80                       | 76.9       | 1.4 | 1.1-1.7 | 0.006   | 1.2                                                            | 1.0-1.6 | -       |  |
| <b>Men</b>                  |     |                          |            |     |         |         |                                                                |         |         |  |
| oOSfr ≤ 10 yrs              | 105 | 82                       | 78.1       | 1.4 | 1.2-1.8 | 0.001   | 1.3                                                            | 1.0-1.7 | 0.03    |  |
| oOSfr > 10 yrs              | 100 | 62                       | 62.0       | 0.9 | 0.7-1.2 | -       | 0.9                                                            | 0.7-1.2 | -       |  |
| Ofr ≤ 10 yrs                | 190 | 134                      | 70.5       | 1.2 | 1.0-1.5 | 0.03    | 1.2                                                            | 1.0-1.4 | -       |  |
| Ofr > 10 yrs                | 277 | 189                      | 68.2       | 1.1 | 0.9-1.3 | -       | 1.0                                                            | 0.9-1.2 | -       |  |
| Vfr ≤ 10 yrs                | 40  | 32                       | 80.0       | 1.3 | 0.9-1.9 | -       | 1.2                                                            | 0.8-1.7 | -       |  |
| Vfr > 10 yrs                | 33  | 28                       | 84.8       | 1.8 | 1.2-2.6 | 0.003   | 1.6                                                            | 1.1-2.3 | 0.02    |  |
| <b>Women</b>                |     |                          |            |     |         |         |                                                                |         |         |  |
| oOSfr ≤ 10 yrs              | 439 | 302                      | 68.8       | 1.3 | 1.1-1.4 | 0.0007  | 1.2                                                            | 1.0-1.4 | 0.009   |  |
| oOSfr > 10 yrs              | 365 | 246                      | 67.4       | 1.2 | 1.0-1.4 | 0.01    | 1.2                                                            | 1.1-1.4 | 0.004   |  |
| Ofr ≤ 10 yrs                | 208 | 135                      | 64.9       | 1.2 | 1.0-1.5 | 0.04    | 1.2                                                            | 1.0-1.4 | -       |  |
| Ofr > 10 yrs                | 228 | 141                      | 61.8       | 1.0 | 0.9-1.2 | -       | 1.0                                                            | 0.8-1.2 | -       |  |
| Vfr ≤ 10 yrs                | 151 | 117                      | 77.5       | 1.5 | 1.3-1.9 | <.0001  | 1.4                                                            | 1.2-1.8 | 0.0003  |  |
| Vfr > 10 yrs                | 71  | 52                       | 73.2       | 1.2 | 0.9-1.6 | -       | 1.1                                                            | 0.8-1.5 | -       |  |

<sup>a</sup> Individuals that had fractures at osteoporotic site less than 10 years ago. Vertebral fractures are excluded.

<sup>b</sup> Individuals that had fractures at osteoporotic site more than 10 years ago. Vertebral fractures are excluded.

<sup>c</sup> Individuals with all others fractures than those at osteoporotic site which occurred less than 10 years ago.

<sup>d</sup> Individuals with all others fractures than those at osteoporotic site which occurred more than 10 years ago.

<sup>e</sup> Individuals that had vertebral fracture less than 10 years ago.

<sup>f</sup> Individuals that had vertebral fracture more than 10 years ago.

Table 3. Effect of time since fracture on mobility, strength, activity of daily living and quality of live. Adjustment was made for sex and age.

| Measurements                | Osteoporotic fracture for less than 10 yrs ago<br>Vertebral fractures are excluded |                |         | Osteoporotic fracture for more than 10 yrs ago<br>Vertebral fractures are excluded |             |         | Vertebral fracture for less than 10 yrs ago |                |         | Vertebral fracture for more than 10 yrs ago |              |         |
|-----------------------------|------------------------------------------------------------------------------------|----------------|---------|------------------------------------------------------------------------------------|-------------|---------|---------------------------------------------|----------------|---------|---------------------------------------------|--------------|---------|
|                             | Estimate                                                                           | 95% CI         | P-value | Estimate                                                                           | 95% CI      | P-value | Estimate                                    | 95% CI         | P-value | Estimate                                    | 95% CI       | P-value |
| 6 meter walk, (sec.)        | 0.36                                                                               | 0.2-0.5        | <.0001  | -0.21                                                                              | - 0.2- 0.16 | -       | 0.52                                        | 0.2-0.8        | 0.001   | 0.38                                        | 0.02-0.8     | 0.05    |
| Timed Up and Go, (sec.)     | 0.70                                                                               | 0.38-1.03      | <.0001  | 0.08                                                                               | 0.27-0.43   | -       | 1.37                                        | 0.85-1.88      | <.0001  | 0.84                                        | 0.15-1.52    | 0.02    |
| Quadriceps strength, ( kg.) | -1.11                                                                              | -1.93- (-0.30) | 0.007   | -0.21                                                                              | -1.08-0.65  | -       | -3.48                                       | -4.76- (-2.21) | <.0001  | -1.33                                       | -3.03-0.37   | -       |
| Grip strength, (kg.)        | -1.24                                                                              | -1.91- (-0.57) | 0.0003  | -0.21                                                                              | -0.92- 0.49 | -       | -2.22                                       | -3.27-(-1.17)  | <.0001  | -0.75                                       | -2.12-0.61   | -       |
| ADL                         | 0.15                                                                               | 0.06-0.24      | 0.001   | 0.01                                                                               | -0.09-0.10  | -       | 0.33                                        | 0.19-0.47      | <.0001  | 0.28                                        | 0.09-0.47    | <0.01   |
| Quality of life             | -0.04                                                                              | -0.06-(-0.02)  | 0.0003  | 0.01                                                                               | -0.01-0.03  | -       | -0.08                                       | -0.12-(-0.05)  | <.0001  | -0.05                                       | -0.10-(0.01) | 0.02    |
